# Supplementary material for: Treeline species Betula ermanii are more adaptable to alpine environments than non-treeline species Picea jezoensis: evidence from leaf functional traits
Source: Copernicus journal article supplement (doi:10.5194/egusphere-2025-369), 2025-02-04
Supplement: Supplementary file [file egusphere-2025-369-AC1-supplement.pdf]

Table 3. Contrasting adaptive strategies of *B. ermanii* and *P. jezoensis* along the elevational gradient.

|                          | <i>B. ermanii</i> (Treeline species)                      | <i>P. jezoensis</i> (Non-treeline species)                         |
|--------------------------|-----------------------------------------------------------|--------------------------------------------------------------------|
| <b>Resource strategy</b> | Acquisitive                                               | Conservative                                                       |
| <b>Trait variation</b>   | Lower overall variation; highest in photosynthetic traits | Higher variation; especially in photosynthetic and nutrient traits |
| <b>Trait integration</b> | High coordination (tight network)                         | Low coordination (modular network)                                 |
| <b>Water strategy</b>    | Radical (high gs, low WUE)                                | Conservative (high $\delta^{13}\text{C}$ , low gs)                 |
| <b>Plasticity</b>        | Functionally integrated, less flexible                    | More flexible, but less integrated                                 |
| <b>Implication</b>       | Potential for rapid response under warming                | Greater persistence in shaded/stable environments                  |

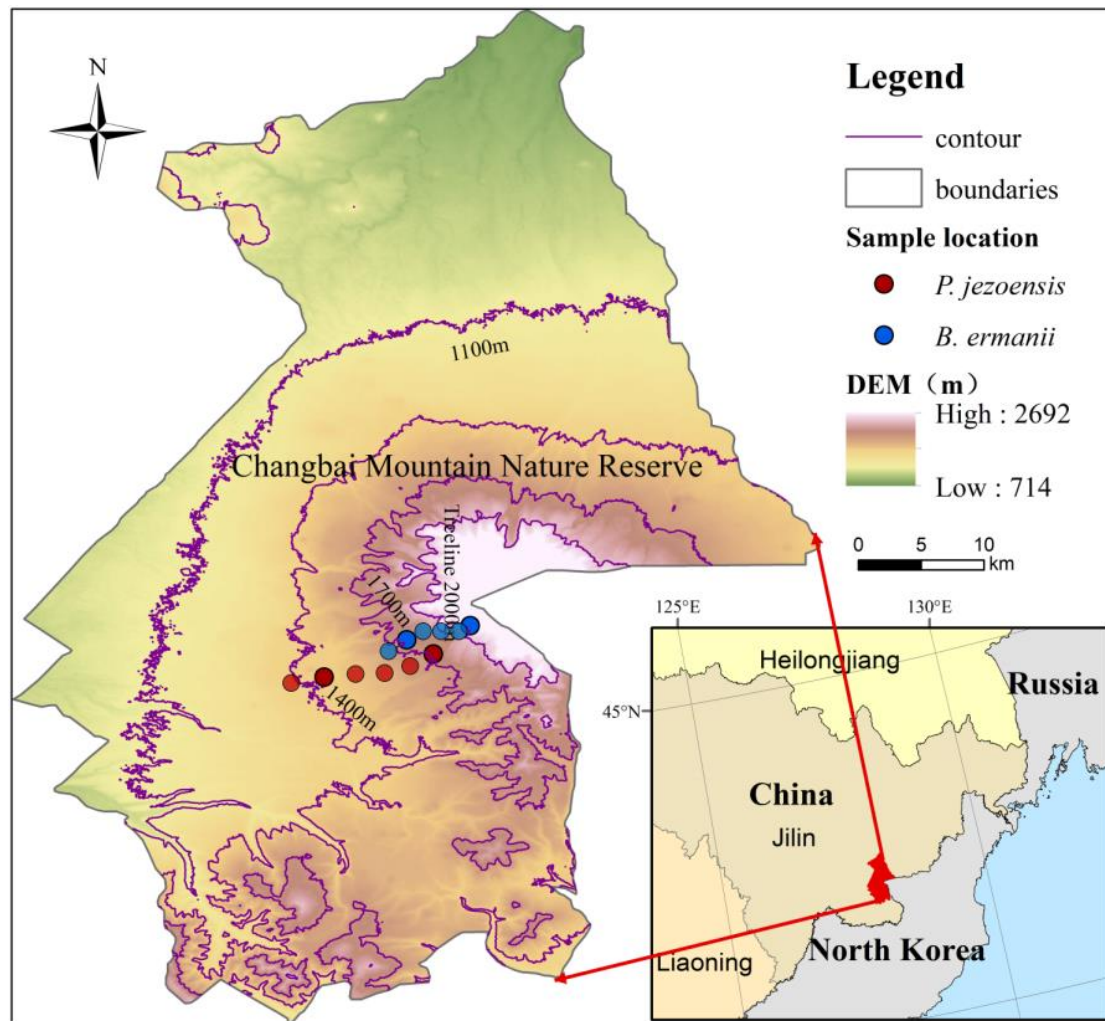

Figure 1. Map of the study area on Changbai Mt showing the main distribution zones of *B. ermanii* and *P. jezoensis*, along with the locations of sampling plots and their corresponding elevations.

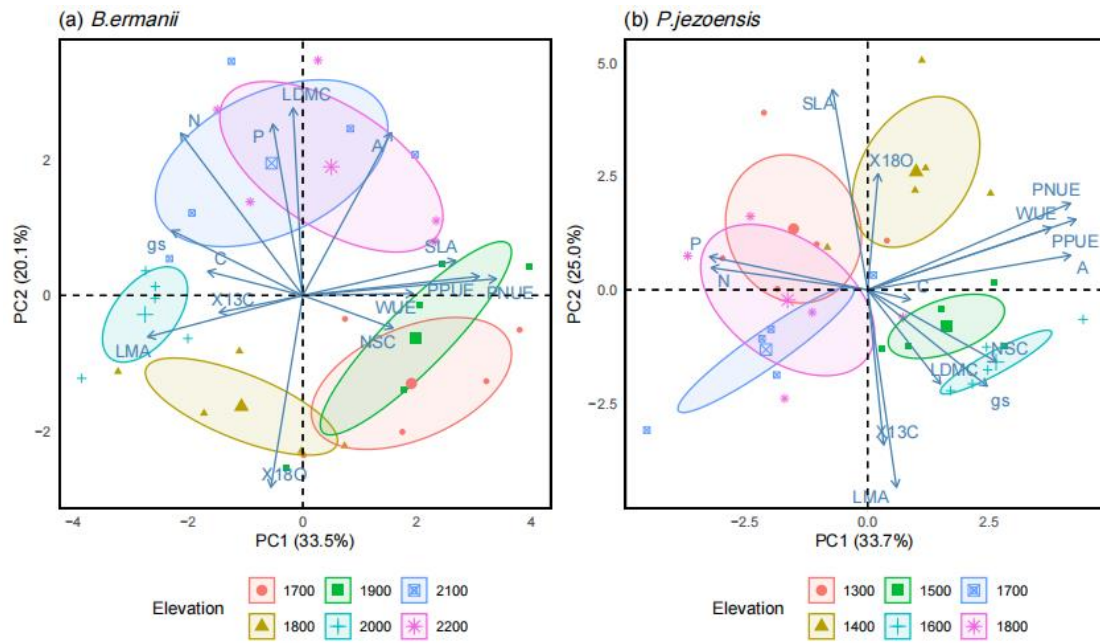

Figure 1. PCA analysis of 13 leaf functional traits of *B. ermanii* and *P. jezoensis*. The parameter descriptions are provided in Table 1.

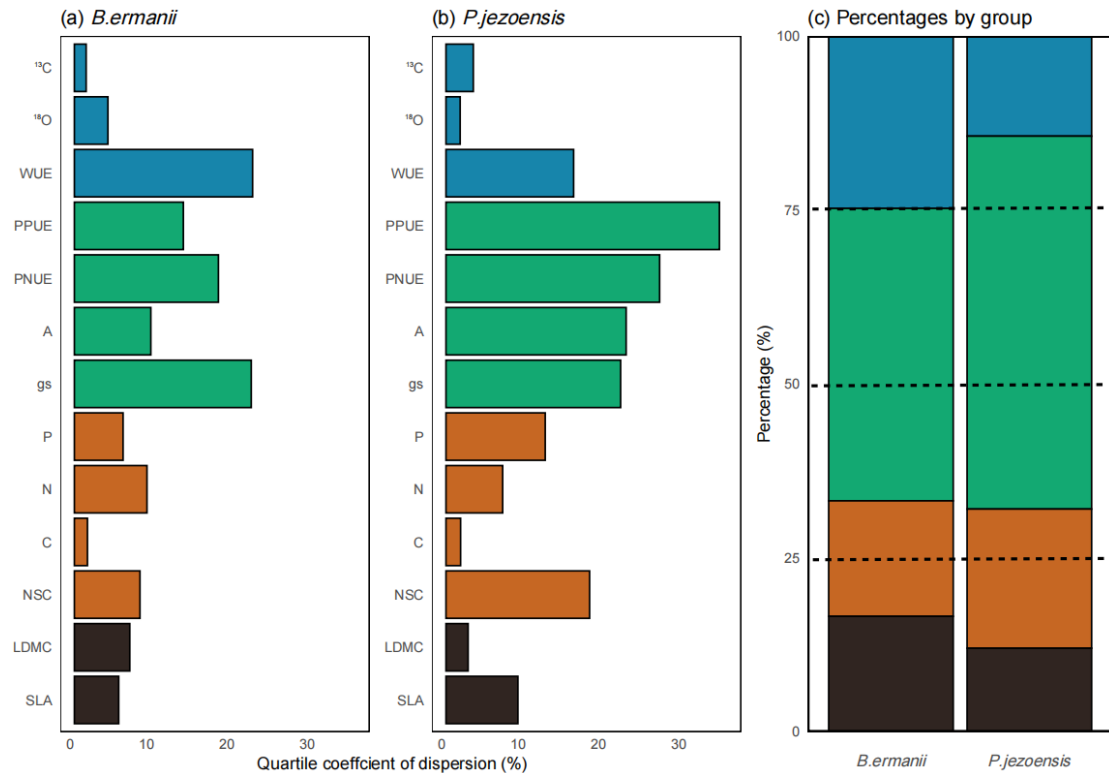

Figure 3. Intraspecific variation in leaf functional traits of *B. ermanii* (a) and *P. jezoensis* (b). (a-b) showed the QCD for 13 leaf traits in *B. ermanii* and *P. jezoensis* (b), respectively, grouping by functional category. Trait groupings are color-coded: structural (brown), nutrient (orange), photosynthetic (green), and hydraulic (blue) traits. (c) showed the relative contribution of each trait group to total intraspecific variation (%) for *B. ermanii* and *P. jezoensis*. For each species, we calculated the average QCD per group and then divided it by the summed average QCD across all four trait groups. This reflects the dominant sources of phenotypic variability in each species. See Table 1 for trait abbreviations.
