# Supplementary material for: Treeline species Betula ermanii are more adaptable to alpine environments than non-treeline species Picea jezoensis: evidence from leaf functional traits
Source: Copernicus journal article supplement (doi:10.5194/egusphere-2025-369), 2025-02-04
Supplement: Supplementary file [file egusphere-2025-369-AC2-supplement.pdf]

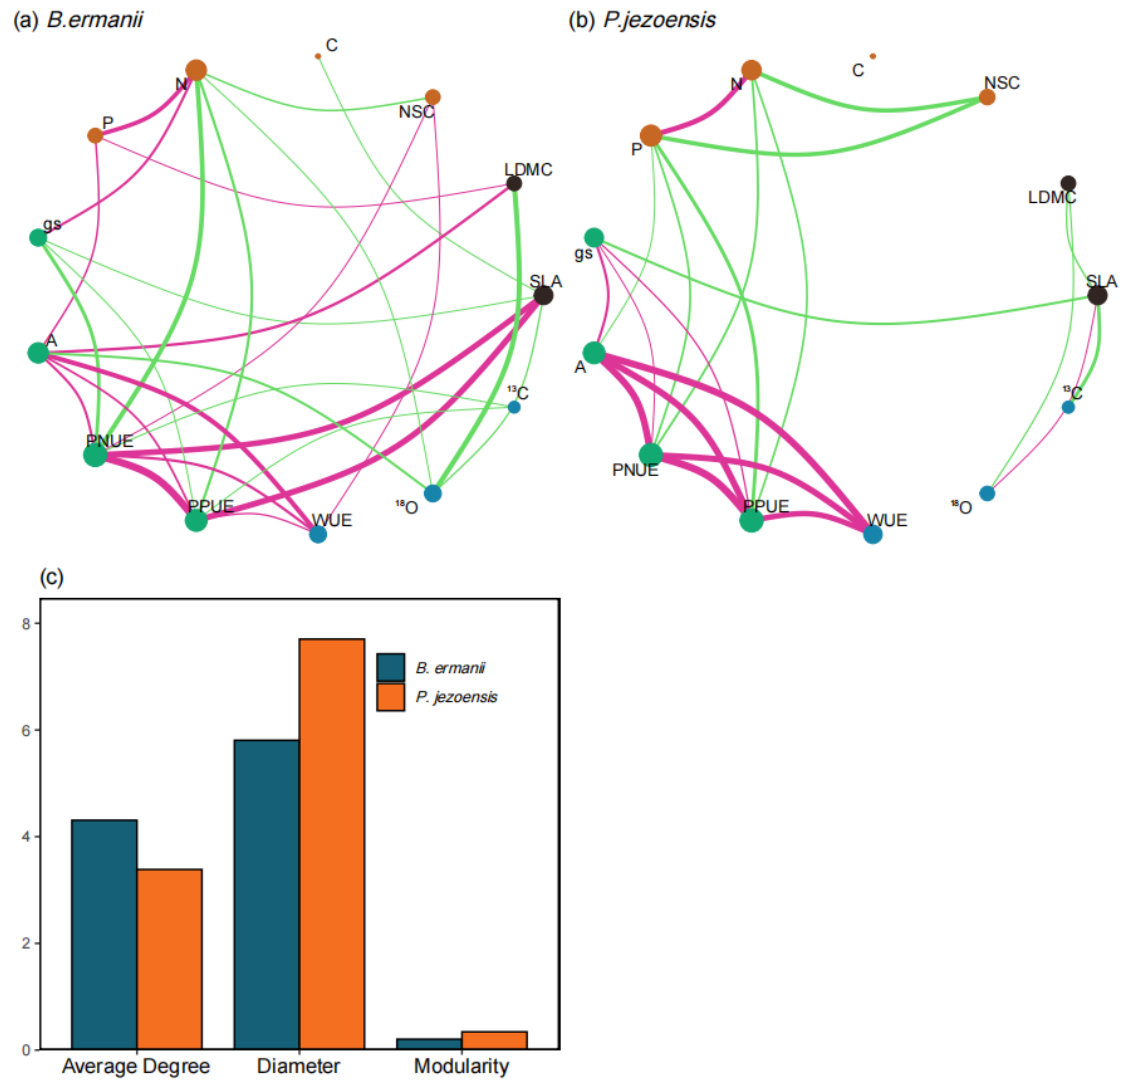

Figure 4. Network of leaf functional traits of (a) *B. ermanii* and (b) *P. jezoensis*. Pink lines indicate significant positive correlations ( $p < 0.05$ ), and green lines indicate significant negative correlations. (c) showed the overall parameters of both leaf functional trait network. The parameter descriptions are provided in Table S2.
